# Supplementary material for: Co-movement of astral microtubules, organelles and F-actin by dynein and actomyosin forces in frog egg cytoplasm
Source: eLife. 2020 Dec 7;9:e60047. doi: 10.7554/eLife.60047 (PMC7759381; doi:10.7554/eLife.60047)
Supplement: Figure 4—figure supplement 1—source data 1. [file elife-60047-fig4-figsupp1-data1.xlsx]

## Sheet: Sheet1
Step 1. Normalized rows to 1
Gene symbol	HOOK2 I #1	HOOK2 I #2	HOOK2 I #3	HOOK2 M #1	HOOK2 M #2	IgG #1	IgG #2	IgG #3
IgG	0.12856	0.0960412	0.0911839	0.210218	0.0989966	0.125	0.125	0.125
HOOK2	0.19974	0.19974	0.19974	0.19974	0.19974	0	0.0013	0
HOOK3	0.278845	0.201827	0.294999	0.115205	0.081715	0.0106644	0.00180161	0.0149426
ACTR1A	0.350373	0.224987	0.277561	0.0408051	0.0313797	0.00953545	0.0434327	0.0219267
CLIP1	0.40487	0.207937	0.203049	0.0993645	0.0678289	0.00853081	0.0046943	0.00372491
DCTN1	0.348504	0.264101	0.307878	0.0390242	0.0259822	0.00684615	0.00766434	0
DCTN2	0.353362	0.244592	0.295793	0.041277	0.0325952	0.0086979	0.0121148	0.0115686
DCTN3	0.371877	0.248585	0.246986	0.0582382	0.0424262	0.011125	0.00873094	0.0120327
DCTN5	0.347739	0.226632	0.282909	0.0393146	0.0316284	0.0052267	0.0419429	0.0246082
DCTN6	0.351365	0.217767	0.279814	0.0486185	0.0295614	0.0088498	0.0444211	0.019603
DYNC1H1	0.287511	0.334329	0.30663	0.0232918	0.0367806	0.00505246	0.00640448	0
DYNC1I2	0.344432	0.258791	0.310612	0.0373303	0.0327135	0.00897961	0.00714068	0
DYNC1LI1	0.367734	0.25352	0.299632	0.0361328	0.028341	0.00676365	0.00787577	0
DYNC1LI2	0.369133	0.270155	0.272022	0.0420839	0.032248	0.00644279	0.00791551	0
DYNLRB1	0.346347	0.301329	0.281483	0.0369997	0.0284189	0.00535559	0	6.63434e-05
DYNLT1	0.382255	0.290784	0.248239	0.0327886	0.0260978	0.00542369	0.00704454	0.00736709
PAFAH1B1	0.342204	0.23908	0.295129	0.0636899	0.0402348	0.00845638	0.00660926	0.00459576
Step 2. Normalized rows to ~5 so each HOOK2 condition has HOOK2=1
Gene symbol	HOOK2 I #1	HOOK2 I #2	HOOK2 I #3	HOOK2 M #1	HOOK2 M #2	IgG #1	IgG #2	IgG #3
IgG	0.643639	0.480831	0.456513	1.05246	0.495627	0.625814	0.625814	0.625814
HOOK2	1	1	1	1	1	0	0.00650848	0
HOOK3	1.39604	1.01045	1.47691	0.576777	0.409107	0.0533916	0.00901978	0.0748105
ACTR1A	1.75414	1.1264	1.38961	0.204291	0.157103	0.0477393	0.217446	0.109776
CLIP1	2.02699	1.04104	1.01657	0.497469	0.339586	0.0427096	0.0235021	0.0186488
DCTN1	1.74479	1.32223	1.54139	0.195375	0.13008	0.0342753	0.0383716	0
DCTN2	1.76911	1.22455	1.48089	0.206654	0.163188	0.0435461	0.0606529	0.0579184
DCTN3	1.8618	1.24454	1.23654	0.29157	0.212407	0.0556973	0.0437115	0.0602419
DCTN5	1.74096	1.13463	1.41638	0.196829	0.158348	0.0261675	0.209988	0.123201
DCTN6	1.75911	1.09025	1.40089	0.243409	0.147999	0.0443066	0.222395	0.0981427
DYNC1H1	1.43943	1.67382	1.53515	0.11661	0.184142	0.0252952	0.0320641	0
DYNC1I2	1.7244	1.29564	1.55508	0.186895	0.16378	0.0449565	0.0357499	0
DYNC1LI1	1.84106	1.26925	1.50011	0.180899	0.14189	0.0338623	0.0394301	0
DYNC1LI2	1.84807	1.35253	1.36188	0.210693	0.16145	0.0322559	0.0396291	0
DYNLRB1	1.73399	1.50861	1.40925	0.185239	0.142279	0.0268128	0	0.000332149
DYNLT1	1.91376	1.45581	1.24281	0.164156	0.130659	0.0271538	0.0352686	0.0368834
PAFAH1B1	1.71325	1.19696	1.47757	0.318864	0.201436	0.0423369	0.0330893	0.0230087
Step 3. Log base 2
Gene symbol	HOOK2 I #1	HOOK2 I #2	HOOK2 I #3	HOOK2 M #1	HOOK2 M #2	IgG #1	IgG #2	IgG #3
HOOK2	0	0	0	0	0		-7.26346
HOOK3	0.481343	0.0149933	0.562586	-0.793914	-1.28945	-4.22724	-6.79269	-3.74062
ACTR1A	0.810767	0.17172	0.474679	-2.2913	-2.67022	-4.38868	-2.20127	-3.18736
CLIP1	1.01934	0.058025	0.0237038	-1.00732	-1.55815	-4.5493	-5.41107	-5.74478
DCTN1	0.80305	0.402969	0.624236	-2.35568	-2.94253	-4.86669	-4.70382
DCTN2	0.823023	0.292251	0.566465	-2.27471	-2.61539	-4.52131	-4.04328	-4.10984
DCTN3	0.896701	0.315614	0.306304	-1.77809	-2.2351	-4.16625	-4.51584	-4.05309
DCTN5	0.799881	0.182226	0.502213	-2.34499	-2.65883	-5.25608	-2.25162	-3.02091
DCTN6	0.814849	0.124662	0.486344	-2.03855	-2.75634	-4.49633	-2.16881	-3.34898
DYNC1H1	0.525495	0.743146	0.618376	-3.10023	-2.44111	-5.30499	-4.9629
DYNC1I2	0.786096	0.373667	0.636992	-2.4197	-2.61017	-4.47533	-4.80592
DYNC1LI1	0.880539	0.343978	0.585071	-2.46674	-2.81716	-4.88418	-4.66456
DYNC1LI2	0.886017	0.435664	0.4456	-2.24678	-2.63084	-4.95429	-4.6573
DYNLRB1	0.794095	0.593219	0.494924	-2.43254	-2.8132	-5.22093		-11.5559
DYNLT1	0.936413	0.541825	0.313607	-2.60686	-2.93612	-5.2027	-4.82547	-4.76088
PAFAH1B1	0.776734	0.259373	0.563223	-1.64899	-2.31161	-4.56194	-4.91749	-5.44168
IgG	-0.635676	-1.0564	-1.13127	0.0737616	-1.01267	-0.676195	-0.676195	-0.676195
